# Supplementary material for: Collaborative Assessment and Health Risk of Heavy Metals in Soils and Tea Leaves in the Southwest Region of China
Source: MDPI journal article supplement (doi:10.3390/ijerph181910151), 2021-09-27
Supplement: s1 [file s1]

## SUPPLEMENTAL MATERIAL

Table showing the concentration of heavy metals in tea plantation soil from the different areas; table showing the parameters of collaborative assessment.

**Table S1** The concentration of heavy metals in tea plantation soil from different areas

| Region                                | Pb                  | As    | Cd    | Cr    | Reference            |
|---------------------------------------|---------------------|-------|-------|-------|----------------------|
|                                       | mg kg <sup>-1</sup> |       |       |       |                      |
| Guizhou, China                        | 67.1                | 22.8  | 0.47  | 77.9  | Zhang et al.,2013    |
| Guizhou, China                        | 40.9                | 26.3  | 0.33  | 66    | Zhang et al.,2020    |
| Jiangsu, China                        | 34.65               | -     | -     | 84.74 | Wen et al.,2018      |
| Guangdong, China                      | 14.4                | -     | 0.063 | 29.3  | Li et al.,2010       |
| Shandong, China                       | 34.1                | 5.79  | 0.16  | 47.6  | Hu et al.,2009       |
| Sichuan, China                        | 12.0                | 6.52  | 0.072 | 25.6  | Tan et al.,2005      |
| Hunan, China                          | 42.7                | 12.4  | 0.074 | 92.2  | Guo et al.,2008      |
| Anhui, China                          | 8.5                 | 68.0  | -     | 51.8  | Fang et al.,2015     |
| Anhui, China                          | 45.77               | -     | 0.76  | -     | Peng et al.,2018     |
| Jiangxi, China                        | 24.6                | 21.8  | 0.133 | 64.7  | Xiong et al.,2011    |
| Fujian(a mine county), China          | 78.0                | 50.7  | 0.23  | 110   | Wang et al.,2018     |
| Fujian(Wuyi moutian) , China          | 76.5                | 6.13  | 0.19  | 67.5  | Ye et al.,2016       |
| Fujian(Anxi) , China                  | 48.3                | 7.37  | 0.036 | 53.0  | Guo et al.,2011      |
| Gilan and Mazandaran provinces , Iran | 11.43               | -     | 0.36  | -     | Mohammad et al.,2014 |
| Hubei, China                          | 23.1                | 8.91  | 0.11  | 50.6  | Wang et al.,2010     |
| Shanxi, China                         | -                   | -     | -     | 47.0  | Zhao et al.,2016     |
| Study area                            | 29.27               | 14.87 | 0.18  | 79.06 | This study           |

**Table S2.** The calculation of parameter for collaborative assessment.

| NO. | pH   | RIE       | Soil     |          |           | Agricultural product |                    | Hyper-standard,X | Hyper-standard,Y | Hyper-standard,Z | IICQ  |
|-----|------|-----------|----------|----------|-----------|----------------------|--------------------|------------------|------------------|------------------|-------|
|     |      |           | DDD<br>B | DDS<br>B | IICQ<br>s | QIA<br>P             | IICQ <sub>AP</sub> |                  |                  |                  |       |
| 1   | 6.60 | 0.79<br>4 | 1.331    | 7.264    | 2.344     | 0.609                | 0.017              | 1                | 3                | 0                | 2.361 |
| 2   | 7.18 | 0.81<br>5 | 1.392    | 7.264    | 2.390     | 0.451                | 0.012              | 1                | 3                | 0                | 2.402 |
| 3   | 4.17 | 0.64<br>7 | 0.979    | 6.700    | 0.438     | 0.441                | 0.013              | 0                | 3                | 0                | 0.452 |
| 4   | 4.03 | 0.64<br>3 | 0.966    | 6.700    | 0.433     | 0.408                | 0.012              | 0                | 3                | 0                | 0.445 |

|    |      |           |       |       |       |       |       |   |   |   |       |
|----|------|-----------|-------|-------|-------|-------|-------|---|---|---|-------|
| 5  | 4.03 | 0.71<br>3 | 1.112 | 6.700 | 2.045 | 0.409 | 0.012 | 1 | 2 | 0 | 2.057 |
| 6  | 4.17 | 0.71<br>2 | 1.113 | 6.700 | 2.044 | 0.427 | 0.013 | 1 | 2 | 0 | 2.057 |
| 7  | 5.05 | 0.75<br>5 | 1.138 | 6.700 | 2.434 | 0.509 | 0.015 | 1 | 4 | 0 | 2.450 |
| 8  | 5.13 | 0.74<br>0 | 1.114 | 6.700 | 2.239 | 0.528 | 0.016 | 1 | 3 | 0 | 2.255 |
| 9  | 4.56 | 0.70<br>1 | 1.071 | 6.700 | 0.320 | 0.417 | 0.012 | 0 | 2 | 0 | 0.332 |
| 10 | 4.76 | 0.74<br>8 | 1.155 | 6.700 | 2.092 | 0.402 | 0.012 | 1 | 2 | 0 | 2.104 |
| 11 | 4.72 | 0.84<br>7 | 1.387 | 6.700 | 0.828 | 0.605 | 1.139 | 0 | 4 | 1 | 1.967 |
| 12 | 6.53 | 0.91<br>2 | 1.591 | 7.264 | 4.700 | 0.623 | 1.142 | 2 | 4 | 1 | 5.842 |
| 13 | 5.21 | 0.67<br>0 | 1.066 | 6.700 | 0.318 | 0.469 | 0.014 | 0 | 2 | 0 | 0.332 |
| 14 | 4.84 | 0.54<br>1 | 0.831 | 6.700 | 0.000 | 0.583 | 1.134 | 0 | 0 | 1 | 1.134 |
| 15 | 4.72 | 0.54<br>8 | 0.842 | 6.700 | 0.000 | 0.561 | 1.129 | 0 | 0 | 1 | 1.129 |
| 16 | 4.75 | 0.55<br>9 | 0.865 | 6.700 | 0.000 | 0.508 | 1.117 | 0 | 0 | 1 | 1.117 |
| 17 | 5.55 | 0.40<br>1 | 0.593 | 6.899 | 0.086 | 0.428 | 0.012 | 0 | 1 | 0 | 0.098 |
| 18 | 5.39 | 0.56<br>6 | 0.880 | 6.899 | 0.000 | 0.620 | 1.142 | 0 | 0 | 1 | 1.142 |
| 19 | 5.65 | 0.67<br>9 | 1.048 | 6.899 | 0.456 | 0.691 | 1.158 | 0 | 3 | 1 | 1.614 |
| 20 | 7.47 | 0.63<br>2 | 1.039 | 7.448 | 0.419 | 0.403 | 0.011 | 0 | 3 | 0 | 0.429 |
| 21 | 6.65 | 0.56<br>2 | 0.915 | 7.448 | 0.123 | 0.367 | 0.010 | 0 | 1 | 0 | 0.133 |
| 22 | 7.78 | 0.67<br>9 | 1.134 | 7.448 | 0.305 | 0.464 | 0.012 | 0 | 2 | 0 | 0.317 |
| 23 | 7.18 | 0.80<br>1 | 1.365 | 7.448 | 1.984 | 0.678 | 1.154 | 1 | 1 | 1 | 3.138 |
| 24 | 6.84 | 0.57<br>4 | 0.942 | 7.448 | 0.126 | 0.660 | 1.150 | 0 | 1 | 1 | 1.276 |
| 25 | 7.03 | 0.59<br>3 | 0.970 | 7.448 | 0.130 | 0.678 | 1.154 | 0 | 1 | 1 | 1.284 |
| 26 | 7.64 | 0.77<br>8 | 1.315 | 7.448 | 2.131 | 0.671 | 1.152 | 1 | 2 | 1 | 3.284 |
| 27 | 5.53 | 0.63<br>1 | 0.981 | 6.899 | 0.285 | 0.496 | 0.014 | 0 | 2 | 0 | 0.299 |
| 28 | 7.80 | 0.78<br>7 | 1.335 | 7.448 | 2.146 | 0.651 | 1.148 | 1 | 2 | 1 | 3.293 |
| 29 | 6.37 | 0.66<br>0 | 1.076 | 7.136 | 0.603 | 0.421 | 0.012 | 0 | 4 | 0 | 0.615 |
| 30 | 6.51 | 0.64<br>5 | 1.070 | 7.448 | 0.431 | 0.463 | 0.012 | 0 | 3 | 0 | 0.444 |
| 31 | 5.63 | 0.60<br>2 | 0.935 | 6.899 | 0.271 | 0.424 | 0.012 | 0 | 2 | 0 | 0.283 |
| 32 | 5.61 | 0.71<br>8 | 1.173 | 6.899 | 0.680 | 0.373 | 0.011 | 0 | 4 | 0 | 0.691 |
| 33 | 4.91 | 0.56<br>6 | 0.916 | 6.763 | 0.271 | 0.364 | 0.011 | 0 | 2 | 0 | 0.282 |
| 34 | 5.08 | 0.56<br>0 | 0.878 | 6.763 | 0.130 | 0.398 | 0.012 | 0 | 1 | 0 | 0.142 |
| 35 | 5.14 | 0.58<br>7 | 0.952 | 6.763 | 0.282 | 0.300 | 0.009 | 0 | 2 | 0 | 0.290 |

|    |      |           |       |       |       |       |       |   |   |   |       |
|----|------|-----------|-------|-------|-------|-------|-------|---|---|---|-------|
| 36 | 4.83 | 0.57<br>3 | 0.923 | 6.763 | 0.273 | 0.361 | 0.011 | 0 | 2 | 0 | 0.284 |
| 37 | 4.57 | 0.56<br>2 | 0.899 | 6.763 | 0.000 | 0.252 | 0.007 | 0 | 0 | 0 | 0.007 |
| 38 | 4.42 | 0.55<br>4 | 0.979 | 7.371 | 0.266 | 0.279 | 0.008 | 0 | 2 | 0 | 0.273 |
| 39 | 4.95 | 0.61<br>2 | 0.980 | 6.763 | 0.290 | 0.229 | 0.007 | 0 | 2 | 0 | 0.297 |
| 40 | 4.85 | 0.56<br>5 | 0.903 | 6.763 | 0.000 | 0.525 | 0.016 | 0 | 0 | 0 | 0.016 |
| 41 | 5.33 | 0.46<br>5 | 0.752 | 6.763 | 0.000 | 0.265 | 0.008 | 0 | 0 | 0 | 0.008 |
| 42 | 5.24 | 0.56<br>8 | 0.989 | 7.371 | 0.268 | 0.285 | 0.008 | 0 | 2 | 0 | 0.276 |
| 43 | 4.89 | 0.52<br>5 | 0.846 | 6.763 | 0.000 | 0.302 | 0.009 | 0 | 0 | 0 | 0.009 |
| 44 | 4.80 | 0.53<br>8 | 0.943 | 7.371 | 0.256 | 0.327 | 0.009 | 0 | 2 | 0 | 0.265 |
| 45 | 5.20 | 0.48<br>8 | 0.787 | 6.763 | 0.000 | 0.349 | 0.010 | 0 | 0 | 0 | 0.010 |
| 46 | 4.85 | 0.73<br>6 | 1.174 | 6.763 | 0.695 | 0.336 | 0.010 | 0 | 4 | 0 | 0.705 |
| 47 | 5.15 | 0.60<br>8 | 0.989 | 6.763 | 0.292 | 0.498 | 0.015 | 0 | 2 | 0 | 0.307 |
| 48 | 4.54 | 0.57<br>3 | 0.892 | 6.763 | 0.264 | 0.576 | 1.132 | 0 | 2 | 1 | 1.396 |
| 49 | 4.71 | 0.63<br>1 | 0.984 | 6.763 | 0.291 | 0.601 | 1.138 | 0 | 2 | 1 | 1.429 |
| 50 | 4.30 | 0.62<br>2 | 0.972 | 6.763 | 0.287 | 0.422 | 0.012 | 0 | 2 | 0 | 0.300 |
| 51 | 4.76 | 0.56<br>9 | 0.895 | 6.763 | 0.265 | 0.409 | 0.012 | 0 | 2 | 0 | 0.277 |
| 52 | 3.65 | 0.57<br>6 | 0.907 | 6.763 | 0.268 | 0.500 | 0.015 | 0 | 2 | 0 | 0.283 |
| 53 | 4.68 | 0.57<br>5 | 0.907 | 6.763 | 0.268 | 0.408 | 0.012 | 0 | 2 | 0 | 0.280 |
| 54 | 4.69 | 0.58<br>5 | 0.921 | 6.763 | 0.272 | 0.464 | 0.014 | 0 | 2 | 0 | 0.286 |
| 55 | 4.91 | 0.73<br>4 | 1.143 | 6.763 | 2.072 | 0.526 | 1.121 | 1 | 2 | 1 | 3.193 |
| 56 | 4.98 | 0.64<br>6 | 0.993 | 6.763 | 0.294 | 0.498 | 0.015 | 0 | 2 | 0 | 0.309 |
| 57 | 4.93 | 0.64<br>1 | 0.985 | 6.763 | 0.291 | 0.494 | 0.015 | 0 | 2 | 0 | 0.306 |
| 58 | 4.13 | 0.74<br>2 | 1.141 | 6.763 | 0.506 | 0.448 | 0.013 | 0 | 3 | 0 | 0.520 |
| 59 | 4.18 | 0.63<br>9 | 0.992 | 6.763 | 0.293 | 0.428 | 0.013 | 0 | 2 | 0 | 0.306 |
| 60 | 4.86 | 0.57<br>2 | 0.897 | 6.763 | 0.265 | 0.402 | 0.012 | 0 | 2 | 0 | 0.277 |
| 61 | 5.64 | 0.54<br>9 | 0.856 | 6.763 | 0.127 | 0.429 | 0.013 | 0 | 1 | 0 | 0.139 |
| 62 | 5.63 | 0.54<br>5 | 0.848 | 6.763 | 0.125 | 0.485 | 0.014 | 0 | 1 | 0 | 0.140 |
| 63 | 5.84 | 0.75<br>4 | 1.156 | 6.763 | 2.095 | 0.458 | 0.014 | 1 | 2 | 0 | 2.109 |
| 64 | 6.33 | 0.71<br>9 | 1.103 | 6.763 | 2.045 | 0.465 | 0.014 | 1 | 2 | 0 | 2.059 |
| 65 | 4.97 | 0.73<br>9 | 1.132 | 6.763 | 2.073 | 0.573 | 1.131 | 1 | 2 | 1 | 3.205 |
| 66 | 5.27 | 0.74<br>0 | 1.132 | 6.763 | 0.502 | 0.464 | 0.014 | 0 | 3 | 0 | 0.516 |

|    |      |           |       |       |       |       |       |   |   |   |       |
|----|------|-----------|-------|-------|-------|-------|-------|---|---|---|-------|
| 67 | 5.52 | 0.69<br>1 | 1.063 | 6.763 | 0.314 | 0.458 | 0.014 | 0 | 2 | 0 | 0.328 |
| 68 | 4.76 | 0.69<br>1 | 1.063 | 6.763 | 0.314 | 0.384 | 0.011 | 0 | 2 | 0 | 0.326 |
| 69 | 4.75 | 0.66<br>5 | 1.023 | 6.763 | 0.303 | 0.479 | 0.014 | 0 | 2 | 0 | 0.317 |
| 70 | 5.75 | 0.72<br>4 | 1.115 | 6.763 | 0.495 | 0.465 | 0.014 | 0 | 3 | 0 | 0.508 |
| 71 | 6.22 | 0.72<br>7 | 1.117 | 6.763 | 0.496 | 0.494 | 0.015 | 0 | 3 | 0 | 0.510 |
| 72 | 5.78 | 0.71<br>3 | 1.097 | 6.763 | 0.487 | 0.481 | 0.014 | 0 | 3 | 0 | 0.501 |
| 73 | 5.29 | 0.71<br>3 | 1.103 | 6.763 | 0.326 | 0.585 | 1.134 | 0 | 2 | 1 | 1.460 |
| 74 | 4.94 | 1.24<br>7 | 2.088 | 6.763 | 5.729 | 0.528 | 0.016 | 2 | 4 | 0 | 5.745 |
| 75 | 5.20 | 0.72<br>5 | 1.122 | 6.763 | 0.498 | 0.502 | 0.015 | 0 | 3 | 0 | 0.512 |
| 76 | 7.40 | 0.72<br>6 | 1.185 | 7.290 | 0.488 | 0.483 | 0.013 | 0 | 3 | 0 | 0.501 |
| 77 | 6.17 | 0.76<br>7 | 1.181 | 6.763 | 0.524 | 0.440 | 0.013 | 0 | 3 | 0 | 0.537 |
| 78 | 5.74 | 0.86<br>7 | 1.336 | 6.625 | 2.069 | 0.618 | 1.142 | 1 | 1 | 1 | 3.211 |
| 79 | 4.57 | 0.61<br>0 | 0.910 | 6.625 | 0.137 | 0.349 | 0.011 | 0 | 1 | 0 | 0.148 |
| 80 | 4.92 | 1.00<br>3 | 1.662 | 6.625 | 2.756 | 0.474 | 0.014 | 1 | 3 | 0 | 2.770 |
| 81 | 5.47 | 0.93<br>7 | 1.375 | 6.625 | 6.435 | 0.583 | 1.134 | 3 | 3 | 1 | 7.570 |
| 82 | 4.84 | 0.65<br>2 | 1.013 | 6.625 | 0.306 | 0.355 | 0.011 | 0 | 2 | 0 | 0.317 |
| 83 | 4.55 | 0.64<br>3 | 0.954 | 6.625 | 0.288 | 0.345 | 0.010 | 0 | 2 | 0 | 0.298 |
| 84 | 4.71 | 0.66<br>8 | 0.992 | 6.625 | 0.299 | 0.427 | 0.013 | 0 | 2 | 0 | 0.312 |
| 85 | 5.18 | 1.03<br>0 | 1.562 | 6.625 | 4.768 | 0.692 | 1.159 | 2 | 3 | 1 | 5.927 |
| 86 | 4.59 | 0.67<br>5 | 0.989 | 6.625 | 1.974 | 0.521 | 1.120 | 1 | 2 | 1 | 3.093 |
| 87 | 4.12 | 0.59<br>6 | 0.884 | 6.625 | 0.000 | 0.527 | 0.016 | 0 | 0 | 0 | 0.016 |
| 88 | 4.36 | 0.61<br>5 | 0.915 | 6.625 | 0.138 | 0.563 | 1.130 | 0 | 1 | 1 | 1.268 |
| 89 | 4.28 | 0.60<br>2 | 0.902 | 6.625 | 0.136 | 0.339 | 0.010 | 0 | 1 | 0 | 0.146 |
| 90 | 5.10 | 0.59<br>3 | 0.879 | 6.625 | 0.133 | 0.355 | 0.011 | 0 | 1 | 0 | 0.143 |
| 91 | 4.58 | 0.55<br>2 | 0.816 | 6.625 | 0.123 | 0.354 | 0.011 | 0 | 1 | 0 | 0.134 |
| 92 | 7.50 | 0.65<br>5 | 1.068 | 7.171 | 0.149 | 0.430 | 0.012 | 0 | 1 | 0 | 0.161 |
| 93 | 4.82 | 0.57<br>2 | 0.849 | 6.625 | 0.128 | 0.479 | 0.014 | 0 | 1 | 0 | 0.143 |
| 94 | 5.74 | 0.51<br>7 | 0.764 | 6.625 | 0.000 | 0.383 | 0.012 | 0 | 0 | 0 | 0.012 |
| 95 | 4.55 | 0.58<br>0 | 0.878 | 6.625 | 0.133 | 0.368 | 0.011 | 0 | 1 | 0 | 0.144 |
| 96 | 5.14 | 0.70<br>6 | 1.060 | 6.625 | 0.320 | 0.486 | 1.112 | 0 | 2 | 1 | 1.432 |
| 97 | 7.40 | 0.69<br>5 | 1.107 | 7.171 | 0.309 | 0.443 | 0.012 | 0 | 2 | 0 | 0.321 |

|     |      |           |       |       |       |       |       |   |   |   |       |
|-----|------|-----------|-------|-------|-------|-------|-------|---|---|---|-------|
| 98  | 6.20 | 0.78<br>7 | 1.207 | 6.625 | 2.151 | 0.523 | 1.120 | 1 | 2 | 1 | 3.272 |
| 99  | 5.71 | 0.62<br>0 | 0.915 | 6.625 | 0.276 | 0.531 | 0.016 | 0 | 2 | 0 | 0.292 |
| 100 | 5.79 | 0.98<br>4 | 1.501 | 6.625 | 2.890 | 0.486 | 0.015 | 1 | 4 | 0 | 2.905 |
| 101 | 4.66 | 0.63<br>0 | 0.932 | 6.625 | 0.281 | 0.429 | 0.013 | 0 | 2 | 0 | 0.294 |
| 102 | 4.40 | 0.70<br>9 | 1.108 | 6.625 | 0.669 | 0.510 | 0.015 | 0 | 4 | 0 | 0.685 |
| 103 | 4.47 | 0.61<br>8 | 0.938 | 6.625 | 0.425 | 0.431 | 0.013 | 0 | 3 | 0 | 0.438 |
| 104 | 4.50 | 0.55<br>2 | 0.823 | 6.625 | 0.000 | 0.378 | 0.011 | 0 | 0 | 0 | 0.011 |
| 105 | 4.51 | 0.52<br>2 | 0.775 | 6.625 | 0.000 | 0.426 | 0.013 | 0 | 0 | 0 | 0.013 |
| 106 | 4.77 | 0.68<br>1 | 1.048 | 6.625 | 0.158 | 0.421 | 0.013 | 0 | 1 | 0 | 0.171 |
| 107 | 4.44 | 0.58<br>9 | 0.876 | 6.625 | 0.264 | 0.444 | 0.013 | 0 | 2 | 0 | 0.278 |
| 108 | 4.61 | 0.70<br>3 | 1.067 | 6.625 | 0.483 | 0.385 | 0.012 | 0 | 3 | 0 | 0.495 |
| 109 | 4.68 | 0.61<br>5 | 0.917 | 6.625 | 0.277 | 0.392 | 0.012 | 0 | 2 | 0 | 0.289 |
| 110 | 4.65 | 0.61<br>3 | 0.918 | 6.625 | 0.277 | 0.399 | 0.012 | 0 | 2 | 0 | 0.289 |
| 111 | 4.96 | 0.55<br>0 | 0.818 | 6.625 | 0.000 | 0.397 | 0.012 | 0 | 0 | 0 | 0.012 |
| 112 | 5.23 | 0.85<br>9 | 1.300 | 6.625 | 2.447 | 0.572 | 1.132 | 1 | 3 | 1 | 3.579 |
| 113 | 4.41 | 0.66<br>2 | 1.001 | 6.625 | 0.302 | 0.408 | 0.012 | 0 | 2 |   | 0.315 |
| 114 | 4.23 | 0.73<br>0 | 1.111 | 6.625 | 0.335 | 0.394 | 0.012 | 0 | 2 |   | 0.347 |
| 115 | 5.01 | 0.63<br>5 | 0.951 | 6.625 | 0.144 | 0.535 | 0.016 | 0 | 1 |   | 0.160 |
| 116 | 7.30 | 0.91<br>9 | 1.485 | 7.171 | 2.747 | 0.829 | 1.189 | 1 | 4 | 1 | 3.936 |
| 117 | 7.22 | 0.83<br>7 | 1.344 | 7.171 | 2.587 | 0.754 | 2.323 | 1 | 4 | 2 | 4.909 |
| 118 | 5.41 | 1.17<br>5 | 1.847 | 6.625 | 5.465 | 0.691 | 1.159 | 2 | 4 | 1 | 6.624 |
| 119 | 5.63 | 0.67<br>0 | 0.980 | 6.625 | 1.818 | 0.775 | 1.178 | 1 | 1 | 1 | 2.996 |
| 120 | 6.69 | 0.64<br>1 | 1.014 | 7.171 | 0.283 | 0.684 | 1.156 | 0 | 2 | 1 | 1.439 |
| 121 | 5.07 | 0.61<br>0 | 0.905 | 6.625 | 0.137 | 0.463 | 0.014 | 0 | 1 | 0 | 0.151 |
| 122 | 6.24 | 0.74<br>3 | 1.113 | 6.625 | 2.079 | 0.621 | 1.143 | 1 | 2 | 1 | 3.222 |
| 123 | 5.91 | 0.71<br>0 | 1.077 | 6.625 | 2.035 | 0.580 | 1.134 | 1 | 2 | 1 | 3.169 |
| 124 | 5.55 | 0.61<br>1 | 0.916 | 6.625 | 0.277 | 0.593 | 1.137 | 0 | 2 | 1 | 1.413 |
| 125 | 4.74 | 0.63<br>8 | 0.963 | 6.625 | 0.145 | 0.592 | 1.136 | 0 | 1 | 1 | 1.282 |
| 126 | 4.34 | 0.56<br>7 | 0.834 | 6.625 | 0.126 | 0.556 | 1.128 | 0 | 1 | 1 | 1.254 |
| 127 | 5.77 | 0.57<br>8 | 0.872 | 6.625 | 0.132 | 0.565 | 1.130 | 0 | 1 | 1 | 1.262 |
| 128 | 4.18 | 0.68<br>3 | 1.028 | 6.625 | 0.310 | 0.411 | 0.012 | 0 | 2 | 0 | 0.323 |

|     |      |           |       |       |       |       |       |   |   |   |       |
|-----|------|-----------|-------|-------|-------|-------|-------|---|---|---|-------|
| 129 | 7.70 | 0.61<br>6 | 0.964 | 7.171 | 0.269 | 0.606 | 1.138 | 0 | 2 | 1 | 1.407 |
| 130 | 5.35 | 0.56<br>8 | 0.868 | 6.625 | 0.000 | 0.442 | 0.013 | 0 | 0 | 0 | 0.013 |
| 131 | 5.38 | 0.77<br>6 | 1.220 | 6.625 | 2.328 | 0.421 | 0.013 | 1 | 3 | 0 | 2.341 |
| 132 | 5.04 | 0.61<br>9 | 0.913 | 6.625 | 0.276 | 0.493 | 0.015 | 0 | 2 | 0 | 0.291 |
| 133 | 4.91 | 0.63<br>7 | 0.949 | 6.625 | 0.143 | 0.440 | 0.013 | 0 | 1 | 0 | 0.156 |
| 134 | 4.36 | 0.76<br>8 | 1.159 | 6.625 | 0.525 | 0.411 | 0.012 | 0 | 3 | 0 | 0.537 |
| 135 | 4.92 | 0.70<br>0 | 1.041 | 6.625 | 0.314 | 0.395 | 0.012 | 0 | 2 | 0 | 0.326 |
| 136 | 4.32 | 0.59<br>8 | 0.924 | 6.625 | 0.000 | 0.447 | 0.014 | 0 | 0 | 0 | 0.014 |
| 137 | 5.37 | 0.53<br>6 | 0.809 | 6.625 | 0.000 | 0.412 | 0.012 | 0 | 0 | 0 | 0.012 |
| 138 | 4.82 | 0.69<br>5 | 1.056 | 6.625 | 0.319 | 0.373 | 0.011 | 0 | 2 | 0 | 0.330 |
| 139 | 4.87 | 0.65<br>0 | 0.948 | 6.625 | 0.286 | 0.374 | 0.011 | 0 | 2 | 0 | 0.298 |
| 140 | 4.99 | 0.54<br>0 | 0.822 | 6.625 | 0.124 | 0.422 | 0.013 | 0 | 1 | 0 | 0.137 |
| 141 | 5.22 | 0.63<br>2 | 0.973 | 6.625 | 0.294 | 0.523 | 0.016 | 0 | 2 | 0 | 0.309 |
| 142 | 4.67 | 0.65<br>4 | 1.005 | 6.625 | 0.455 | 0.451 | 0.014 | 0 | 3 | 0 | 0.469 |
| 143 | 4.80 | 0.64<br>4 | 0.957 | 6.625 | 0.289 | 0.343 | 0.010 | 0 | 2 | 0 | 0.299 |
| 144 | 4.86 | 0.69<br>5 | 1.071 | 6.625 | 0.647 | 0.478 | 0.014 | 0 | 4 | 0 | 0.661 |
| 145 | 5.02 | 0.70<br>4 | 1.092 | 6.625 | 0.495 | 0.364 | 0.011 | 0 | 3 | 0 | 0.506 |
| 146 | 4.80 | 0.87<br>5 | 1.384 | 6.625 | 2.502 | 0.415 | 0.013 | 1 | 3 | 0 | 2.514 |
| 147 | 4.84 | 0.66<br>6 | 1.005 | 6.625 | 0.304 | 0.431 | 0.013 | 0 | 2 | 0 | 0.317 |
| 148 | 4.40 | 0.61<br>6 | 0.910 | 6.625 | 0.275 | 0.700 | 1.161 | 0 | 2 | 1 | 1.436 |
| 149 | 4.44 | 0.70<br>4 | 1.034 | 6.625 | 0.468 | 0.467 | 0.014 | 0 | 3 | 0 | 0.482 |
| 150 | 5.26 | 0.63<br>4 | 0.922 | 6.625 | 0.278 | 0.587 | 1.135 | 0 | 2 | 1 | 1.414 |
| 151 | 4.73 | 1.26<br>6 | 1.937 | 6.625 | 5.116 | 0.584 | 0.018 | 2 | 2 | 0 | 5.134 |
| 152 | 5.02 | 0.66<br>1 | 0.954 | 6.625 | 1.949 | 0.599 | 1.138 | 1 | 2 | 1 | 3.086 |
| 153 | 5.24 | 0.64<br>4 | 0.928 | 6.625 | 1.925 | 0.777 | 2.334 | 1 | 2 | 2 | 4.259 |
| 154 | 6.71 | 0.61<br>7 | 0.982 | 7.171 | 0.274 | 0.410 | 0.011 | 0 | 2 | 0 | 0.285 |
| 155 | 7.36 | 0.48<br>3 | 0.761 | 7.171 | 0.000 | 0.407 | 0.011 | 0 | 0 | 0 | 0.011 |
| 156 | 7.21 | 0.74<br>6 | 1.182 | 7.171 | 2.405 | 0.611 | 0.017 | 1 | 4 | 0 | 2.422 |
| 157 | 7.50 | 0.49<br>5 | 0.771 | 7.171 | 0.107 | 0.373 | 0.010 | 0 | 1 | 0 | 0.118 |
| 158 | 5.40 | 0.64<br>8 | 0.977 | 6.625 | 0.295 | 0.392 | 0.012 | 0 | 2 | 0 | 0.307 |
| 159 | 4.79 | 0.62<br>2 | 0.941 | 6.625 | 0.142 | 0.539 | 0.016 | 0 | 1 | 0 | 0.158 |

|     |      |           |       |       |       |       |       |   |   |   |       |
|-----|------|-----------|-------|-------|-------|-------|-------|---|---|---|-------|
| 160 | 5.18 | 0.66<br>0 | 1.007 | 6.625 | 0.304 | 0.440 | 0.013 | 0 | 2 | 0 | 0.317 |
| 161 | 5.32 | 0.79<br>8 | 1.240 | 6.625 | 2.359 | 0.555 | 0.017 | 1 | 3 | 0 | 2.376 |
| 162 | 5.26 | 0.64<br>7 | 1.086 | 6.625 | 0.328 | 0.531 | 0.016 | 0 | 2 | 0 | 0.344 |
| 163 | 5.50 | 0.47<br>4 | 0.772 | 6.625 | 0.000 | 0.422 | 0.013 | 0 | 0 | 0 | 0.013 |
| 164 | 5.68 | 0.60<br>9 | 0.948 | 6.625 | 0.143 | 0.395 | 0.012 | 0 | 1 | 0 | 0.155 |
| 165 | 5.29 | 1.02<br>5 | 1.646 | 6.625 | 3.018 | 0.599 | 0.018 | 1 | 4 | 0 | 3.036 |
| 166 | 5.43 | 0.54<br>5 | 0.822 | 6.625 | 0.124 | 0.418 | 0.013 | 0 | 1 | 0 | 0.137 |
| 167 | 5.93 | 0.50<br>5 | 0.780 | 6.625 | 0.118 | 0.507 | 0.015 | 0 | 1 | 0 | 0.133 |
| 168 | 5.84 | 0.60<br>8 | 0.941 | 6.625 | 0.284 | 0.535 | 1.123 | 0 | 2 | 1 | 1.407 |
| 169 | 5.27 | 0.55<br>9 | 0.837 | 6.625 | 0.000 | 0.406 | 0.012 | 0 | 0 | 0 | 0.012 |
| 170 | 5.56 | 0.60<br>2 | 0.913 | 6.625 | 0.000 | 0.542 | 0.016 | 0 | 0 | 0 | 0.016 |
| 171 | 6.03 | 0.59<br>9 | 0.899 | 6.625 | 0.136 | 0.393 | 0.012 | 0 | 1 | 0 | 0.148 |
| 172 | 5.17 | 0.56<br>8 | 0.868 | 6.625 | 0.000 | 0.357 | 0.011 | 0 | 0 | 0 | 0.011 |
| 173 | 5.17 | 0.71<br>8 | 1.108 | 6.625 | 1.885 | 0.388 | 0.012 | 1 | 1 | 0 | 1.897 |
| 174 | 5.14 | 0.54<br>6 | 0.823 | 6.625 | 0.000 | 0.484 | 0.015 | 0 | 0 | 0 | 0.015 |
| 175 | 4.57 | 0.50<br>5 | 0.825 | 6.625 | 0.249 | 0.212 | 0.006 | 0 | 2 | 0 | 0.255 |
| 176 | 4.79 | 0.73<br>3 | 1.125 | 6.625 | 0.510 | 0.482 | 0.015 | 0 | 3 | 0 | 0.524 |
| 177 | 5.03 | 0.77<br>4 | 1.204 | 6.625 | 0.727 | 0.551 | 0.017 | 0 | 4 | 0 | 0.743 |
| 178 | 4.30 | 0.60<br>1 | 0.900 | 6.625 | 0.136 | 0.473 | 0.014 | 0 | 1 | 0 | 0.150 |
| 179 | 4.46 | 0.69<br>9 | 1.080 | 6.625 | 0.163 | 0.293 | 0.009 | 0 | 1 | 0 | 0.172 |
| 180 | 6.14 | 0.61<br>7 | 0.924 | 6.625 | 0.140 | 0.618 | 1.142 | 0 | 1 | 1 | 1.282 |
| 181 | 5.19 | 0.78<br>2 | 1.188 | 6.625 | 0.359 | 0.324 | 0.010 | 0 | 2 | 0 | 0.368 |
| 182 | 4.51 | 0.41<br>3 | 0.742 | 7.405 | 0.000 | 0.429 | 0.012 | 0 | 0 | 0 | 0.012 |
| 183 | 5.16 | 0.60<br>9 | 1.084 | 7.405 | 0.439 | 0.446 | 0.012 | 0 | 3 | 0 | 0.451 |
| 184 | 4.73 | 0.59<br>5 | 1.073 | 7.405 | 0.435 | 0.456 | 0.012 | 0 | 3 | 0 | 0.447 |
| 185 | 5.14 | 0.56<br>8 | 1.020 | 7.405 | 0.275 | 0.438 | 0.012 | 0 | 2 | 0 | 0.287 |
| 186 | 5.23 | 0.60<br>1 | 1.084 | 7.405 | 0.439 | 0.454 | 0.012 | 0 | 3 | 0 | 0.451 |
| 187 | 6.96 | 0.46<br>0 | 0.936 | 8.004 | 0.117 | 0.460 | 0.011 | 0 | 1 | 0 | 0.128 |
| 188 | 5.16 | 0.55<br>0 | 0.987 | 7.405 | 0.267 | 0.426 | 0.012 | 0 | 2 | 0 | 0.278 |
| 189 | 5.08 | 0.56<br>3 | 1.014 | 7.405 | 0.274 | 0.470 | 0.013 | 0 | 2 | 0 | 0.287 |
| 190 | 5.01 | 0.56<br>0 | 1.011 | 7.405 | 0.273 | 0.459 | 0.012 | 0 | 2 | 0 | 0.286 |

|     |      |           |       |       |       |       |       |   |   |   |       |
|-----|------|-----------|-------|-------|-------|-------|-------|---|---|---|-------|
| 191 | 5.49 | 0.35<br>7 | 0.658 | 7.405 | 0.000 | 0.215 | 0.006 | 0 | 0 | 0 | 0.006 |
| 192 | 5.16 | 0.56<br>3 | 1.021 | 7.405 | 0.276 | 0.657 | 1.149 | 0 | 2 | 1 | 1.425 |
| 193 | 7.52 | 0.54<br>5 | 1.043 | 8.004 | 0.391 | 0.454 | 0.011 | 0 | 3 | 0 | 0.402 |
| 194 | 6.02 | 0.44<br>4 | 0.834 | 7.405 | 0.113 | 0.215 | 0.006 | 0 | 1 | 0 | 0.118 |
| 195 | 6.44 | 0.35<br>7 | 0.659 | 7.405 | 0.000 | 0.479 | 0.013 | 0 | 0 | 0 | 0.013 |
| 196 | 6.92 | 0.40<br>1 | 0.821 | 8.004 | 0.103 | 0.232 | 0.006 | 0 | 1 | 0 | 0.108 |
| 197 | 6.77 | 0.40<br>0 | 0.825 | 8.004 | 0.103 | 0.215 | 0.005 | 0 | 1 | 0 | 0.108 |
| 198 | 4.72 | 0.62<br>1 | 1.058 | 7.405 | 1.906 | 0.406 | 0.011 | 1 | 2 | 0 | 1.917 |
| 199 | 4.78 | 0.63<br>8 | 1.090 | 7.405 | 1.932 | 0.427 | 0.012 | 1 | 2 | 0 | 1.944 |
| 200 | 4.68 | 0.66<br>1 | 1.135 | 7.405 | 1.967 | 0.469 | 0.013 | 1 | 2 | 0 | 1.980 |
| 201 | 4.88 | 0.66<br>5 | 1.146 | 7.405 | 1.974 | 0.465 | 0.013 | 1 | 2 | 0 | 1.987 |
| 202 | 4.11 | 0.65<br>7 | 1.126 | 7.405 | 0.456 | 0.452 | 0.012 | 0 | 3 | 0 | 0.468 |
| 203 | 4.83 | 0.65<br>2 | 1.107 | 7.405 | 2.101 | 0.471 | 0.013 | 1 | 3 | 0 | 2.113 |
| 204 | 4.83 | 0.63<br>4 | 1.068 | 7.405 | 2.066 | 0.465 | 0.013 | 1 | 3 | 0 | 2.079 |
| 205 | 4.83 | 0.63<br>7 | 1.080 | 7.405 | 2.075 | 0.476 | 0.013 | 1 | 3 | 0 | 2.088 |
| 206 | 4.36 | 0.63<br>0 | 1.075 | 7.405 | 0.435 | 0.492 | 0.013 | 0 | 3 | 0 | 0.449 |
| 207 | 4.80 | 0.65<br>2 | 1.118 | 7.405 | 1.954 | 0.506 | 0.014 | 1 | 2 | 0 | 1.967 |
| 208 | 4.77 | 0.60<br>6 | 1.026 | 7.405 | 1.883 | 0.452 | 0.012 | 1 | 2 | 0 | 1.895 |
| 209 | 4.93 | 0.65<br>7 | 1.131 | 7.405 | 1.963 | 0.441 | 0.012 | 1 | 2 | 0 | 1.975 |
| 210 | 4.50 | 0.65<br>5 | 1.122 | 7.405 | 2.110 | 0.423 | 0.011 | 1 | 3 | 0 | 2.121 |
| 211 | 4.43 | 0.63<br>3 | 1.081 | 7.405 | 1.925 | 0.447 | 0.012 | 1 | 2 | 0 | 1.937 |
| 212 | 4.55 | 0.68<br>6 | 1.182 | 7.405 | 2.165 | 0.475 | 0.013 | 1 | 3 | 0 | 2.178 |
| 213 | 4.57 | 0.56<br>3 | 0.951 | 7.405 | 0.257 | 0.571 | 0.015 | 0 | 2 | 0 | 0.272 |
| 214 | 4.55 | 0.67<br>1 | 1.186 | 7.405 | 2.151 | 0.519 | 0.014 | 1 | 3 | 0 | 2.166 |
| 215 | 4.96 | 0.56<br>1 | 0.945 | 7.405 | 0.255 | 0.504 | 0.014 | 0 | 2 | 0 | 0.269 |
| 216 | 4.58 | 0.50<br>7 | 0.845 | 7.405 | 0.228 | 0.496 | 0.013 | 0 | 2 | 0 | 0.242 |
| 217 | 4.43 | 0.54<br>6 | 0.918 | 7.405 | 0.248 | 0.459 | 0.012 | 0 | 2 | 0 | 0.260 |
| 218 | 4.88 | 0.52<br>6 | 0.875 | 7.405 | 0.236 | 0.513 | 1.116 | 0 | 2 | 1 | 1.353 |
| 219 | 4.08 | 0.54<br>6 | 0.911 | 7.405 | 0.246 | 0.522 | 0.014 | 0 | 2 | 0 | 0.260 |
| 220 | 4.56 | 0.59<br>7 | 1.014 | 7.405 | 0.411 | 0.516 | 1.117 | 0 | 3 | 1 | 1.528 |
| 221 | 4.52 | 0.49<br>7 | 0.828 | 7.405 | 0.224 | 0.521 | 0.014 | 0 | 2 | 0 | 0.238 |



|     |      |           |       |       |       |       |       |   |   |   |       |
|-----|------|-----------|-------|-------|-------|-------|-------|---|---|---|-------|
| 222 | 5.20 | 0.50<br>5 | 0.841 | 7.405 | 0.114 | 0.389 | 0.011 | 0 | 1 | 0 | 0.124 |
| 223 | 4.61 | 0.53<br>4 | 0.894 | 7.405 | 0.242 | 0.617 | 1.140 | 0 | 2 | 1 | 1.382 |
| 224 | 4.66 | 0.50<br>9 | 0.845 | 7.405 | 0.228 | 0.446 | 0.012 | 0 | 2 | 0 | 0.240 |
| 225 | 4.40 | 0.50<br>7 | 0.843 | 7.405 | 0.228 | 0.591 | 1.134 | 0 | 2 | 1 | 1.362 |
| 226 | 4.63 | 0.53<br>1 | 0.879 | 7.405 | 0.237 | 0.501 | 0.014 | 0 | 2 | 0 | 0.251 |
| 227 | 4.45 | 0.50<br>3 | 0.838 | 7.405 | 0.226 | 0.408 | 0.011 | 0 | 2 | 0 | 0.237 |
| 228 | 6.94 | 0.75<br>8 | 1.428 | 8.386 | 2.268 | 0.439 | 0.010 | 1 | 3 | 0 | 2.279 |
| 229 | 4.97 | 0.66<br>1 | 1.192 | 7.715 | 0.309 | 0.484 | 0.013 | 0 | 2 | 0 | 0.321 |
| 230 | 5.41 | 0.70<br>7 | 1.294 | 7.715 | 2.043 | 0.311 | 0.008 | 1 | 2 | 0 | 2.051 |
| 231 | 5.32 | 0.65<br>0 | 1.157 | 7.715 | 0.300 | 0.478 | 0.012 | 0 | 2 | 0 | 0.312 |
| 232 | 5.48 | 0.70<br>4 | 1.287 | 7.715 | 2.037 | 0.587 | 1.133 | 1 | 2 | 1 | 3.170 |
| 233 | 5.59 | 0.61<br>1 | 1.085 | 7.715 | 0.281 | 0.567 | 0.015 | 0 | 2 | 0 | 0.296 |
| 234 | 5.46 | 0.62<br>3 | 1.114 | 7.715 | 0.289 | 0.424 | 0.011 | 0 | 2 | 0 | 0.300 |
| 235 | 5.40 | 0.50<br>2 | 0.866 | 7.715 | 0.000 | 0.519 | 0.013 | 0 | 0 | 0 | 0.013 |
| 236 | 5.31 | 0.51<br>7 | 0.892 | 7.715 | 0.116 | 0.508 | 1.115 | 0 | 1 | 1 | 1.230 |
| 237 | 4.65 | 0.57<br>4 | 0.987 | 7.715 | 0.256 | 0.743 | 1.168 | 0 | 2 | 1 | 1.424 |
| 238 | 4.68 | 0.54<br>7 | 0.927 | 7.715 | 0.360 | 0.644 | 1.145 | 0 | 3 | 1 | 1.506 |
| 239 | 5.65 | 0.49<br>8 | 0.854 | 7.715 | 0.000 | 0.546 | 0.014 | 0 | 0 | 0 | 0.014 |
| 240 | 4.72 | 0.59<br>1 | 0.969 | 7.715 | 0.251 | 0.474 | 0.012 | 0 | 2 | 0 | 0.264 |
| 241 | 5.59 | 0.56<br>0 | 0.969 | 7.715 | 0.251 | 0.567 | 0.015 | 0 | 2 | 0 | 0.266 |
| 242 | 4.93 | 0.64<br>3 | 1.156 | 7.715 | 0.300 | 0.538 | 0.014 | 0 | 2 | 0 | 0.314 |
| 243 | 5.66 | 0.59<br>7 | 1.016 | 7.715 | 0.263 | 0.616 | 1.139 | 0 | 2 | 1 | 1.402 |
| 244 | 5.24 | 0.67<br>9 | 1.137 | 7.715 | 2.121 | 0.516 | 0.013 | 1 | 3 | 0 | 2.135 |
| 245 | 4.98 | 0.57<br>9 | 0.970 | 7.715 | 0.251 | 0.526 | 0.014 | 0 | 2 | 0 | 0.265 |
| 246 | 4.41 | 0.60<br>5 | 1.027 | 7.715 | 0.399 | 0.534 | 0.014 | 0 | 3 | 0 | 0.413 |
| 247 | 4.26 | 0.63<br>8 | 1.104 | 7.715 | 0.429 | 0.533 | 0.014 | 0 | 3 | 0 | 0.443 |
| 248 | 4.27 | 0.65<br>1 | 1.124 | 7.715 | 0.437 | 0.533 | 0.014 | 0 | 3 | 0 | 0.451 |
| 249 | 4.90 | 0.64<br>0 | 1.137 | 7.715 | 0.590 | 0.908 | 1.205 | 0 | 4 | 1 | 1.795 |
| 250 | 5.22 | 0.63<br>6 | 1.146 | 7.715 | 0.149 | 0.514 | 0.013 | 0 | 1 | 0 | 0.162 |
| 251 | 5.38 | 0.63<br>6 | 1.092 | 7.715 | 0.425 | 0.733 | 1.166 | 0 | 3 | 1 | 1.590 |
| 252 | 5.43 | 0.58<br>1 | 1.004 | 7.715 | 0.260 | 0.583 | 0.015 | 0 | 2 | 0 | 0.275 |

|     |      |           |       |       |       |       |       |   |   |   |       |
|-----|------|-----------|-------|-------|-------|-------|-------|---|---|---|-------|
| 253 | 5.79 | 0.58<br>2 | 0.990 | 7.715 | 0.385 | 0.661 | 1.149 | 0 | 3 | 1 | 1.534 |
| 254 | 5.15 | 0.55<br>1 | 0.963 | 7.715 | 0.250 | 0.532 | 0.014 | 0 | 2 | 0 | 0.263 |
| 255 | 5.62 | 0.63<br>7 | 1.108 | 7.715 | 0.431 | 0.555 | 0.014 | 0 | 3 | 0 | 0.445 |
| 256 | 5.49 | 0.43<br>9 | 0.766 | 7.715 | 0.099 | 0.398 | 0.010 | 0 | 1 | 0 | 0.110 |
| 257 | 4.88 | 0.46<br>4 | 0.825 | 7.715 | 0.107 | 0.421 | 0.011 | 0 | 1 | 0 | 0.118 |
| 258 | 4.43 | 0.41<br>5 | 0.723 | 7.715 | 0.000 | 0.432 | 0.011 | 0 | 0 | 0 | 0.011 |
| 259 | 4.64 | 0.41<br>8 | 0.713 | 7.715 | 0.000 | 0.410 | 0.011 | 0 | 0 | 0 | 0.011 |
| 260 | 4.77 | 0.46<br>2 | 0.804 | 7.715 | 0.104 | 0.503 | 0.013 | 0 | 1 | 0 | 0.117 |
| 261 | 4.50 | 0.44<br>6 | 0.765 | 7.715 | 0.000 | 0.444 | 0.012 | 0 | 0 | 0 | 0.012 |
| 262 | 5.22 | 0.45<br>4 | 0.772 | 7.715 | 0.000 | 0.446 | 0.012 | 0 | 0 | 0 | 0.012 |
| 263 | 4.55 | 0.41<br>8 | 0.698 | 7.715 | 0.000 | 0.496 | 1.112 | 0 | 0 | 1 | 1.112 |
| 264 | 4.71 | 0.41<br>8 | 0.698 | 7.715 | 0.000 | 0.535 | 1.121 | 0 | 0 | 1 | 1.121 |
| 265 | 5.67 | 0.45<br>6 | 0.817 | 7.715 | 0.106 | 0.579 | 1.131 | 0 | 1 | 1 | 1.237 |
| 266 | 5.14 | 0.47<br>6 | 0.809 | 7.715 | 0.000 | 0.619 | 1.140 | 0 | 0 | 1 | 1.140 |
| 267 | 5.06 | 0.48<br>1 | 0.829 | 7.715 | 0.107 | 0.636 | 1.144 | 0 | 1 | 1 | 1.251 |
| 268 | 4.65 | 0.46<br>0 | 0.789 | 7.715 | 0.102 | 0.469 | 0.012 | 0 | 1 | 0 | 0.114 |
| 269 | 4.88 | 0.45<br>5 | 0.783 | 7.715 | 0.101 | 0.463 | 0.012 | 0 | 1 | 0 | 0.113 |
| 270 | 4.62 | 0.48<br>4 | 0.837 | 7.715 | 0.000 | 0.514 | 1.116 | 0 | 0 | 1 | 1.116 |
| 271 | 5.65 | 0.55<br>0 | 0.993 | 7.715 | 0.129 | 0.594 | 1.134 | 0 | 1 | 1 | 1.263 |
| 272 | 5.00 | 0.45<br>0 | 0.762 | 7.715 | 0.000 | 0.561 | 0.015 | 0 | 0 | 0 | 0.015 |
| 273 | 4.88 | 0.51<br>4 | 0.856 | 7.715 | 0.111 | 0.415 | 0.011 | 0 | 1 | 0 | 0.122 |
| 274 | 4.60 | 0.47<br>2 | 0.835 | 7.715 | 0.108 | 0.454 | 0.012 | 0 | 1 | 0 | 0.120 |
| 275 | 4.48 | 0.43<br>3 | 0.761 | 7.715 | 0.099 | 0.512 | 1.116 | 0 | 1 | 1 | 1.214 |
| 276 | 5.36 | 0.48<br>9 | 0.844 | 7.715 | 0.109 | 0.406 | 0.011 | 0 | 1 | 0 | 0.120 |
| 277 | 5.04 | 0.54<br>0 | 0.931 | 7.715 | 0.121 | 0.475 | 0.012 | 0 | 1 | 0 | 0.133 |
| 278 | 5.43 | 0.51<br>9 | 0.918 | 7.715 | 0.119 | 0.514 | 1.116 | 0 | 1 | 1 | 1.235 |
| 279 | 5.17 | 0.62<br>7 | 1.164 | 7.715 | 1.778 | 0.579 | 1.131 | 1 | 1 | 1 | 2.908 |
| 280 | 5.10 | 0.55<br>4 | 1.009 | 7.715 | 0.131 | 0.372 | 0.010 | 0 | 1 | 0 | 0.140 |
| 281 | 6.22 | 0.58<br>2 | 1.065 | 7.715 | 0.138 | 0.416 | 0.011 | 0 | 1 | 0 | 0.149 |
| 282 | 5.29 | 0.57<br>6 | 1.045 | 7.715 | 0.271 | 0.488 | 0.013 | 0 | 2 | 0 | 0.284 |
| 283 | 5.08 | 0.63<br>7 | 1.153 | 7.715 | 0.299 | 0.617 | 0.016 | 0 | 2 | 0 | 0.315 |

|     |      |           |       |       |       |       |       |   |   |   |       |
|-----|------|-----------|-------|-------|-------|-------|-------|---|---|---|-------|
| 284 | 4.51 | 0.58<br>1 | 1.009 | 7.715 | 0.261 | 0.432 | 0.011 | 0 | 2 | 0 | 0.273 |
| 285 | 5.83 | 0.53<br>8 | 0.952 | 7.715 | 0.123 | 0.503 | 0.013 | 0 | 1 | 0 | 0.136 |
| 286 | 5.73 | 0.51<br>8 | 0.905 | 7.715 | 0.117 | 0.477 | 0.012 | 0 | 1 | 0 | 0.130 |
| 287 | 5.70 | 0.55<br>7 | 0.931 | 7.715 | 0.362 | 0.597 | 1.135 | 0 | 3 | 1 | 1.497 |
| 288 | 6.03 | 0.58<br>1 | 0.980 | 7.715 | 0.381 | 0.571 | 1.129 | 0 | 3 | 1 | 1.510 |
| 289 | 5.95 | 0.56<br>7 | 0.954 | 7.715 | 0.371 | 0.583 | 1.132 | 0 | 3 | 1 | 1.503 |
| 290 | 4.64 | 0.48<br>9 | 0.799 | 7.715 | 0.000 | 0.447 | 0.012 | 0 | 0 | 0 | 0.012 |
| 291 | 4.80 | 0.49<br>5 | 0.813 | 7.715 | 0.000 | 0.444 | 0.012 | 0 | 0 | 0 | 0.012 |
| 292 | 4.39 | 0.51<br>1 | 0.832 | 7.715 | 0.216 | 0.421 | 0.011 | 0 | 2 | 0 | 0.227 |
| 293 | 4.39 | 0.51<br>0 | 0.831 | 7.715 | 0.215 | 0.460 | 0.012 | 0 | 2 | 0 | 0.227 |
| 294 | 3.82 | 0.42<br>8 | 0.726 | 7.715 | 0.000 | 0.413 | 0.011 | 0 | 0 | 0 | 0.011 |
| 295 | 4.17 | 0.42<br>4 | 0.717 | 7.715 | 0.000 | 0.458 | 0.012 | 0 | 0 | 0 | 0.012 |
| 296 | 4.66 | 0.45<br>9 | 0.788 | 7.715 | 0.000 | 0.419 | 0.011 | 0 | 0 | 0 | 0.011 |
| 297 | 4.74 | 0.46<br>9 | 0.799 | 7.715 | 0.000 | 0.429 | 0.011 | 0 | 0 | 0 | 0.011 |
| 298 | 4.69 | 0.45<br>4 | 0.765 | 7.715 | 0.000 | 0.416 | 0.011 | 0 | 0 | 0 | 0.011 |
| 299 | 5.03 | 0.58<br>1 | 1.057 | 7.715 | 0.137 | 0.438 | 0.011 | 0 | 1 | 0 | 0.148 |
| 300 | 6.68 | 0.66<br>0 | 1.274 | 8.386 | 0.456 | 0.499 | 0.012 | 0 | 3 | 0 | 0.468 |
| 301 | 6.92 | 0.67<br>9 | 1.328 | 8.386 | 2.154 | 0.582 | 1.130 | 1 | 3 | 1 | 3.285 |
| 302 | 5.97 | 0.58<br>2 | 0.994 | 7.715 | 0.386 | 0.431 | 0.011 | 0 | 3 | 0 | 0.398 |
| 303 | 7.25 | 0.62<br>7 | 1.156 | 8.386 | 0.276 | 0.400 | 0.010 | 0 | 2 | 0 | 0.285 |
| 304 | 5.94 | 0.57<br>7 | 0.988 | 7.715 | 0.384 | 0.606 | 1.137 | 0 | 3 | 1 | 1.521 |
| 305 | 5.61 | 0.58<br>1 | 0.993 | 7.715 | 0.386 | 0.524 | 0.014 | 0 | 3 | 0 | 0.400 |
| 306 | 6.66 | 0.60<br>0 | 1.117 | 8.386 | 0.400 | 0.576 | 1.129 | 0 | 3 | 1 | 1.528 |
| 307 | 5.55 | 0.60<br>7 | 1.028 | 7.715 | 0.400 | 0.521 | 0.014 | 0 | 3 | 0 | 0.413 |
| 308 | 6.57 | 0.64<br>6 | 1.220 | 8.386 | 0.436 | 0.392 | 0.009 | 0 | 3 | 0 | 0.446 |
| 309 | 5.46 | 0.69<br>8 | 1.207 | 7.715 | 0.469 | 0.229 | 0.006 | 0 | 3 | 0 | 0.475 |
| 310 | 5.48 | 0.73<br>4 | 1.288 | 7.715 | 0.501 | 0.252 | 0.007 | 0 | 3 | 0 | 0.507 |
| 311 | 5.39 | 0.66<br>3 | 1.162 | 7.715 | 0.452 | 0.440 | 0.011 | 0 | 3 | 0 | 0.463 |
| 312 | 8.31 | 0.60<br>9 | 1.110 | 8.386 | 0.397 | 0.486 | 0.012 | 0 | 3 | 0 | 0.409 |
| 313 | 5.85 | 0.74<br>2 | 1.329 | 7.715 | 0.517 | 0.678 | 1.153 | 0 | 3 | 1 | 1.670 |
| 314 | 7.76 | 0.59<br>8 | 1.065 | 8.386 | 1.852 | 0.482 | 0.011 | 1 | 2 | 0 | 1.864 |

|     |      |           |       |       |       |       |       |   |   |   |       |
|-----|------|-----------|-------|-------|-------|-------|-------|---|---|---|-------|
| 315 | 7.90 | 0.60<br>0 | 1.068 | 8.386 | 1.855 | 0.425 | 0.010 | 1 | 2 | 0 | 1.865 |
| 316 | 8.15 | 0.60<br>5 | 1.081 | 8.386 | 1.863 | 0.408 | 0.010 | 1 | 2 | 0 | 1.872 |
| 317 | 5.36 | 0.54<br>6 | 0.976 | 7.715 | 0.126 | 0.514 | 0.013 | 0 | 1 | 0 | 0.140 |
| 318 | 5.33 | 0.55<br>9 | 0.993 | 7.715 | 0.129 | 0.540 | 0.014 | 0 | 1 | 0 | 0.143 |
| 319 | 5.24 | 0.53<br>9 | 0.959 | 7.715 | 0.124 | 0.591 | 1.134 | 0 | 1 | 1 | 1.258 |
| 320 | 6.95 | 0.56<br>0 | 0.995 | 8.386 | 1.797 | 0.824 | 1.184 | 1 | 2 | 1 | 2.981 |
| 321 | 6.87 | 0.56<br>3 | 1.001 | 8.386 | 1.802 | 0.492 | 0.012 | 1 | 2 | 0 | 1.814 |
| 322 | 6.79 | 0.55<br>6 | 0.980 | 8.386 | 1.789 | 0.501 | 0.012 | 1 | 2 | 0 | 1.801 |
| 323 | 6.68 | 0.58<br>1 | 1.056 | 8.386 | 1.832 | 0.664 | 1.149 | 1 | 2 | 1 | 2.981 |
| 324 | 8.34 | 0.57<br>0 | 1.088 | 8.386 | 0.130 | 0.632 | 1.141 | 0 | 1 | 1 | 1.271 |
| 325 | 8.46 | 0.56<br>8 | 1.079 | 8.386 | 0.129 | 0.594 | 1.133 | 0 | 1 | 1 | 1.262 |
| 326 | 8.29 | 0.58<br>1 | 1.110 | 8.386 | 0.132 | 0.634 | 1.142 | 0 | 1 | 1 | 1.274 |
| 327 | 8.29 | 0.59<br>3 | 1.080 | 8.386 | 0.258 | 0.629 | 1.141 | 0 | 2 | 1 | 1.398 |
| 328 | 7.93 | 0.59<br>0 | 1.073 | 8.386 | 0.256 | 0.611 | 1.137 | 0 | 2 | 1 | 1.393 |
| 329 | 8.16 | 0.62<br>4 | 1.143 | 8.386 | 0.409 | 0.654 | 1.146 | 0 | 3 | 1 | 1.555 |
| 330 | 7.63 | 0.55<br>9 | 1.051 | 8.386 | 0.125 | 0.640 | 1.143 | 0 | 1 | 1 | 1.269 |
| 331 | 8.06 | 0.63<br>7 | 1.170 | 8.386 | 1.916 | 0.671 | 1.150 | 1 | 2 | 1 | 3.066 |
| 332 | 4.48 | 0.56<br>3 | 1.012 | 7.978 | 0.254 | 0.393 | 0.010 | 0 | 2 | 0 | 0.264 |
| 333 | 4.39 | 0.53<br>3 | 0.934 | 7.715 | 0.242 | 0.376 | 0.010 | 0 | 2 | 0 | 0.252 |
| 334 | 4.30 | 0.61<br>8 | 1.093 | 7.715 | 0.283 | 0.423 | 0.011 | 0 | 2 | 0 | 0.294 |
| 335 | 4.19 | 0.65<br>8 | 1.179 | 7.715 | 0.306 | 0.517 | 0.013 | 0 | 2 | 0 | 0.319 |
| 336 | 4.41 | 0.59<br>9 | 1.055 | 7.715 | 0.274 | 0.512 | 1.116 | 0 | 2 | 1 | 1.389 |
| 337 | 4.46 | 0.54<br>9 | 0.946 | 7.715 | 0.245 | 0.463 | 1.105 | 0 | 2 | 1 | 1.350 |
| 338 | 4.55 | 0.54<br>5 | 0.937 | 7.715 | 0.243 | 0.479 | 1.108 | 0 | 2 | 1 | 1.351 |
| 339 | 4.43 | 0.53<br>3 | 0.936 | 7.715 | 0.243 | 0.392 | 0.010 | 0 | 2 | 0 | 0.253 |
| 340 | 4.57 | 0.49<br>6 | 0.835 | 7.715 | 0.108 | 0.357 | 0.009 | 0 | 1 | 0 | 0.117 |
| 341 | 4.91 | 0.49<br>3 | 0.806 | 7.715 | 0.104 | 0.602 | 1.136 | 0 | 1 | 1 | 1.240 |
| 342 | 4.76 | 0.49<br>3 | 0.807 | 7.715 | 0.105 | 0.626 | 1.141 | 0 | 1 | 1 | 1.246 |
| 343 | 4.59 | 0.56<br>3 | 0.968 | 7.715 | 0.251 | 0.399 | 0.010 | 0 | 2 | 0 | 0.261 |
| 344 | 4.41 | 0.58<br>8 | 1.026 | 7.715 | 0.266 | 0.372 | 0.010 | 0 | 2 | 0 | 0.275 |
| 345 | 4.43 | 0.45<br>4 | 0.741 | 7.715 | 0.000 | 0.471 | 0.012 | 0 | 0 | 0 | 0.012 |

|     |      |           |       |       |       |       |       |   |   |   |       |
|-----|------|-----------|-------|-------|-------|-------|-------|---|---|---|-------|
| 346 | 4.63 | 0.59<br>4 | 1.078 | 7.715 | 0.140 | 0.662 | 1.150 | 0 | 1 | 1 | 1.289 |
| 347 | 4.94 | 0.44<br>3 | 0.757 | 7.715 | 0.000 | 0.459 | 0.012 | 0 | 0 | 0 | 0.012 |
| 348 | 5.83 | 0.60<br>1 | 1.004 | 7.715 | 0.260 | 0.607 | 1.137 | 0 | 2 | 1 | 1.397 |
| 349 | 4.90 | 0.49<br>5 | 0.811 | 7.715 | 0.105 | 0.388 | 0.010 | 0 | 1 | 0 | 0.115 |
| 350 | 4.72 | 0.48<br>7 | 0.795 | 7.715 | 0.103 | 0.378 | 0.010 | 0 | 1 | 0 | 0.113 |
| 351 | 4.63 | 0.65<br>1 | 1.088 | 7.715 | 1.933 | 0.402 | 0.010 | 1 | 2 | 0 | 1.943 |
| 352 | 4.95 | 0.64<br>8 | 1.080 | 7.715 | 1.928 | 0.429 | 0.011 | 1 | 2 | 0 | 1.939 |
| 353 | 4.56 | 0.53<br>6 | 0.888 | 7.715 | 0.230 | 0.341 | 0.009 | 0 | 2 | 0 | 0.239 |
| 354 | 4.44 | 0.55<br>9 | 0.934 | 7.715 | 0.363 | 0.338 | 0.009 | 0 | 3 | 0 | 0.372 |
| 355 | 8.35 | 0.73<br>5 | 1.366 | 8.386 | 2.224 | 0.515 | 0.012 | 1 | 3 | 0 | 2.237 |
| 356 | 7.40 | 0.78<br>3 | 1.605 | 8.386 | 2.357 | 0.547 | 1.122 | 1 | 3 | 1 | 3.479 |
| 357 | 5.80 | 0.61<br>3 | 1.072 | 7.715 | 0.417 | 0.630 | 1.142 | 0 | 3 | 1 | 1.559 |
| 358 | 7.30 | 0.61<br>1 | 1.140 | 8.386 | 0.408 | 0.452 | 0.011 | 0 | 3 | 0 | 0.419 |
| 359 | 7.68 | 0.59<br>9 | 1.121 | 8.386 | 0.401 | 0.537 | 1.120 | 0 | 3 | 1 | 1.521 |
| 360 | 5.79 | 0.76<br>7 | 1.424 | 7.715 | 0.738 | 0.434 | 0.011 | 0 | 4 | 0 | 0.750 |
| 361 | 5.59 | 0.71<br>0 | 1.287 | 7.715 | 0.667 | 0.464 | 0.012 | 0 | 4 | 0 | 0.679 |
| 362 | 5.40 | 0.57<br>9 | 0.974 | 7.715 | 0.379 | 0.535 | 0.014 | 0 | 3 | 0 | 0.393 |
| 363 | 4.36 | 0.59<br>4 | 1.001 | 7.715 | 0.389 | 0.539 | 0.014 | 0 | 3 | 0 | 0.403 |
| 364 | 4.66 | 0.55<br>4 | 0.941 | 7.715 | 0.122 | 0.486 | 0.013 | 0 | 1 | 0 | 0.135 |
| 365 | 5.00 | 0.51<br>3 | 0.844 | 7.715 | 0.219 | 0.505 | 0.013 | 0 | 2 | 0 | 0.232 |
| 366 | 4.60 | 0.50<br>7 | 0.847 | 7.715 | 0.110 | 0.436 | 0.011 | 0 | 1 | 0 | 0.121 |
| 367 | 4.71 | 0.62<br>4 | 1.085 | 7.715 | 0.281 | 0.588 | 1.133 | 0 | 2 | 1 | 1.414 |
| 368 | 4.61 | 0.72<br>0 | 1.340 | 7.715 | 0.521 | 0.460 | 0.012 | 0 | 3 | 0 | 0.533 |
| 369 | 4.68 | 0.61<br>2 | 1.040 | 7.715 | 0.404 | 0.483 | 0.013 | 0 | 3 | 0 | 0.417 |
| 370 | 4.84 | 0.71<br>7 | 1.323 | 7.715 | 0.686 | 0.513 | 0.013 | 0 | 4 | 0 | 0.699 |
| 371 | 4.22 | 0.65<br>3 | 1.186 | 7.715 | 0.308 | 0.449 | 0.012 | 0 | 2 | 0 | 0.319 |
| 372 | 7.43 | 0.54<br>8 | 0.991 | 8.386 | 0.236 | 0.507 | 0.012 | 0 | 2 | 0 | 0.248 |
| 373 | 7.32 | 0.53<br>4 | 0.950 | 8.386 | 0.340 | 0.449 | 0.011 | 0 | 3 | 0 | 0.350 |
| 374 | 7.43 | 0.53<br>0 | 0.943 | 8.386 | 0.225 | 0.888 | 1.199 | 0 | 2 | 1 | 1.424 |
| 375 | 7.36 | 0.55<br>1 | 1.014 | 8.386 | 0.242 | 0.751 | 1.168 | 0 | 2 | 1 | 1.410 |
| 376 | 4.37 | 0.59<br>7 | 1.070 | 7.715 | 0.277 | 0.474 | 0.012 | 0 | 2 | 0 | 0.290 |

|     |      |           |       |       |       |       |       |   |   |   |       |
|-----|------|-----------|-------|-------|-------|-------|-------|---|---|---|-------|
| 377 | 5.97 | 0.64<br>8 | 1.165 | 7.715 | 0.302 | 0.656 | 1.148 | 0 | 2 | 1 | 1.450 |
| 378 | 6.59 | 0.62<br>9 | 1.237 | 8.386 | 0.443 | 0.678 | 1.152 | 0 | 3 | 1 | 1.594 |
| 379 | 4.99 | 0.55<br>7 | 0.983 | 7.715 | 0.255 | 0.514 | 0.013 | 0 | 2 | 0 | 0.268 |
| 380 | 5.63 | 0.63<br>6 | 1.067 | 7.715 | 0.415 | 0.445 | 0.012 | 0 | 3 | 0 | 0.426 |
| 381 | 5.46 | 0.62<br>4 | 1.032 | 7.715 | 0.268 | 0.472 | 0.012 | 0 | 2 | 0 | 0.280 |
| 382 | 4.88 | 0.60<br>9 | 1.002 | 7.715 | 0.260 | 0.518 | 1.117 | 0 | 2 | 1 | 1.377 |
| 383 | 5.76 | 0.63<br>4 | 1.059 | 7.715 | 0.412 | 0.609 | 1.138 | 0 | 3 | 1 | 1.549 |
| 384 | 4.47 | 0.56<br>2 | 0.923 | 7.715 | 0.239 | 0.581 | 1.131 | 0 | 2 | 1 | 1.370 |
| 385 | 4.63 | 0.62<br>5 | 1.088 | 7.715 | 0.423 | 0.349 | 0.009 | 0 | 3 | 0 | 0.432 |
| 386 | 4.78 | 0.66<br>1 | 1.144 | 7.715 | 0.445 | 0.508 | 0.013 | 0 | 3 | 0 | 0.458 |
| 387 | 4.92 | 0.52<br>9 | 0.898 | 7.715 | 0.233 | 0.597 | 1.135 | 0 | 2 | 1 | 1.368 |
| 388 | 5.04 | 0.55<br>4 | 1.009 | 7.715 | 0.131 | 0.540 | 1.122 | 0 | 1 | 1 | 1.253 |
| 389 | 4.91 | 0.56<br>2 | 1.026 | 7.715 | 0.133 | 0.788 | 1.178 | 0 | 1 | 1 | 1.311 |
| 390 | 4.91 | 0.57<br>1 | 1.041 | 7.715 | 0.135 | 0.477 | 0.012 | 0 | 1 | 0 | 0.147 |
| 391 | 5.36 | 0.71<br>9 | 1.360 | 7.715 | 2.072 | 0.683 | 1.154 | 1 | 2 | 1 | 3.226 |
| 392 | 4.79 | 0.90<br>7 | 1.618 | 7.715 | 4.444 | 0.649 | 1.147 | 2 | 3 | 1 | 5.590 |
| 393 | 5.12 | 0.78<br>0 | 1.281 | 7.715 | 2.112 | 0.606 | 1.137 | 1 | 2 | 1 | 3.249 |
| 394 | 5.25 | 0.49<br>4 | 0.830 | 7.715 | 0.108 | 0.502 | 0.013 | 0 | 1 | 0 | 0.121 |
| 395 | 6.13 | 0.67<br>2 | 1.165 | 7.715 | 0.453 | 0.580 | 1.131 | 0 | 3 | 1 | 1.584 |
| 396 | 6.55 | 0.69<br>8 | 1.309 | 8.123 | 0.483 | 0.563 | 1.126 | 0 | 3 | 1 | 1.610 |
| 397 | 4.26 | 0.64<br>5 | 1.098 | 7.715 | 1.929 | 0.390 | 0.010 | 1 | 2 | 0 | 1.940 |
| 398 | 4.21 | 0.55<br>3 | 0.943 | 7.715 | 0.245 | 0.524 | 1.118 | 0 | 2 | 1 | 1.363 |
| 399 | 4.81 | 0.69<br>7 | 1.186 | 7.715 | 0.461 | 0.485 | 0.013 | 0 | 3 | 0 | 0.474 |
| 400 | 4.90 | 0.66<br>2 | 1.160 | 7.715 | 0.451 | 0.404 | 0.010 | 0 | 3 | 0 | 0.462 |
| 401 | 4.81 | 0.63<br>4 | 1.092 | 7.715 | 0.425 | 0.452 | 0.012 | 0 | 3 | 0 | 0.436 |
| 402 | 4.85 | 0.71<br>3 | 1.221 | 7.715 | 0.475 | 0.782 | 1.177 | 0 | 3 | 1 | 1.652 |
| 403 | 6.20 | 0.96<br>1 | 1.647 | 7.715 | 6.522 | 0.540 | 0.014 | 3 | 3 | 0 | 6.536 |
| 404 | 5.13 | 0.47<br>6 | 0.794 | 7.715 | 0.000 | 0.596 | 1.135 | 0 | 0 | 1 | 1.135 |
| 405 | 4.94 | 0.90<br>1 | 1.701 | 7.715 | 2.563 | 0.435 | 0.011 | 1 | 3 | 0 | 2.574 |
| 406 | 4.73 | 0.64<br>6 | 1.141 | 7.715 | 0.444 | 0.508 | 0.013 | 0 | 3 | 0 | 0.457 |
| 407 | 6.31 | 0.58<br>0 | 1.059 | 7.715 | 0.137 | 0.672 | 1.152 | 0 | 1 | 1 | 1.289 |

|     |      |           |       |       |       |       |       |   |   |   |       |
|-----|------|-----------|-------|-------|-------|-------|-------|---|---|---|-------|
| 408 | 6.07 | 1.18<br>5 | 2.053 | 6.611 | 5.613 | 0.774 | 1.178 | 2 | 4 | 1 | 6.791 |
| 409 | 6.68 | 1.20<br>8 | 2.657 | 8.386 | 7.891 | 0.831 | 1.186 | 3 | 4 | 1 | 9.077 |
| 410 | 7.04 | 1.30<br>9 | 2.779 | 8.386 | 5.944 | 0.965 | 1.216 | 2 | 4 | 1 | 7.160 |
| 411 | 5.18 | 0.72<br>2 | 1.281 | 7.715 | 0.498 | 0.454 | 0.012 | 0 | 3 | 0 | 0.510 |
| 412 | 4.72 | 0.73<br>6 | 1.303 | 7.715 | 0.507 | 0.595 | 0.015 | 0 | 3 | 0 | 0.522 |
| 413 | 5.00 | 0.63<br>6 | 1.066 | 7.715 | 0.276 | 0.362 | 0.009 | 0 | 2 | 0 | 0.286 |
| 414 | 4.54 | 0.63<br>5 | 1.057 | 7.715 | 0.274 | 0.362 | 0.009 | 0 | 2 | 0 | 0.283 |
| 415 | 5.03 | 0.67<br>3 | 1.166 | 7.715 | 0.453 | 0.502 | 0.013 | 0 | 3 | 0 | 0.466 |
| 416 | 4.60 | 0.75<br>8 | 1.371 | 7.715 | 2.291 | 0.344 | 0.009 | 1 | 3 | 0 | 2.300 |
| 417 | 5.88 | 0.82<br>7 | 1.579 | 7.715 | 2.441 | 0.575 | 0.015 | 1 | 3 | 0 | 2.456 |
| 418 | 7.01 | 1.57<br>1 | 3.669 | 8.386 | 3.446 | 0.562 | 0.013 | 1 | 2 | 0 | 3.459 |
| 419 | 4.71 | 0.59<br>9 | 1.027 | 7.715 | 0.266 | 0.726 | 1.164 | 0 | 2 | 1 | 1.430 |
| 420 | 5.22 | 0.53<br>1 | 0.922 | 7.715 | 0.119 | 0.559 | 1.126 | 0 | 1 | 1 | 1.246 |
| 421 | 4.69 | 0.77<br>5 | 1.316 | 7.715 | 2.457 | 0.603 | 1.136 | 1 | 4 | 1 | 3.593 |

---
